# Supplementary material
Source: Springer Nature journal article supplement (https://www.springermedizin.de/resource/supplementary/12935_2010_247_MOESM4_ESM.pdf/9540138)

Caspase 3 (% logged)

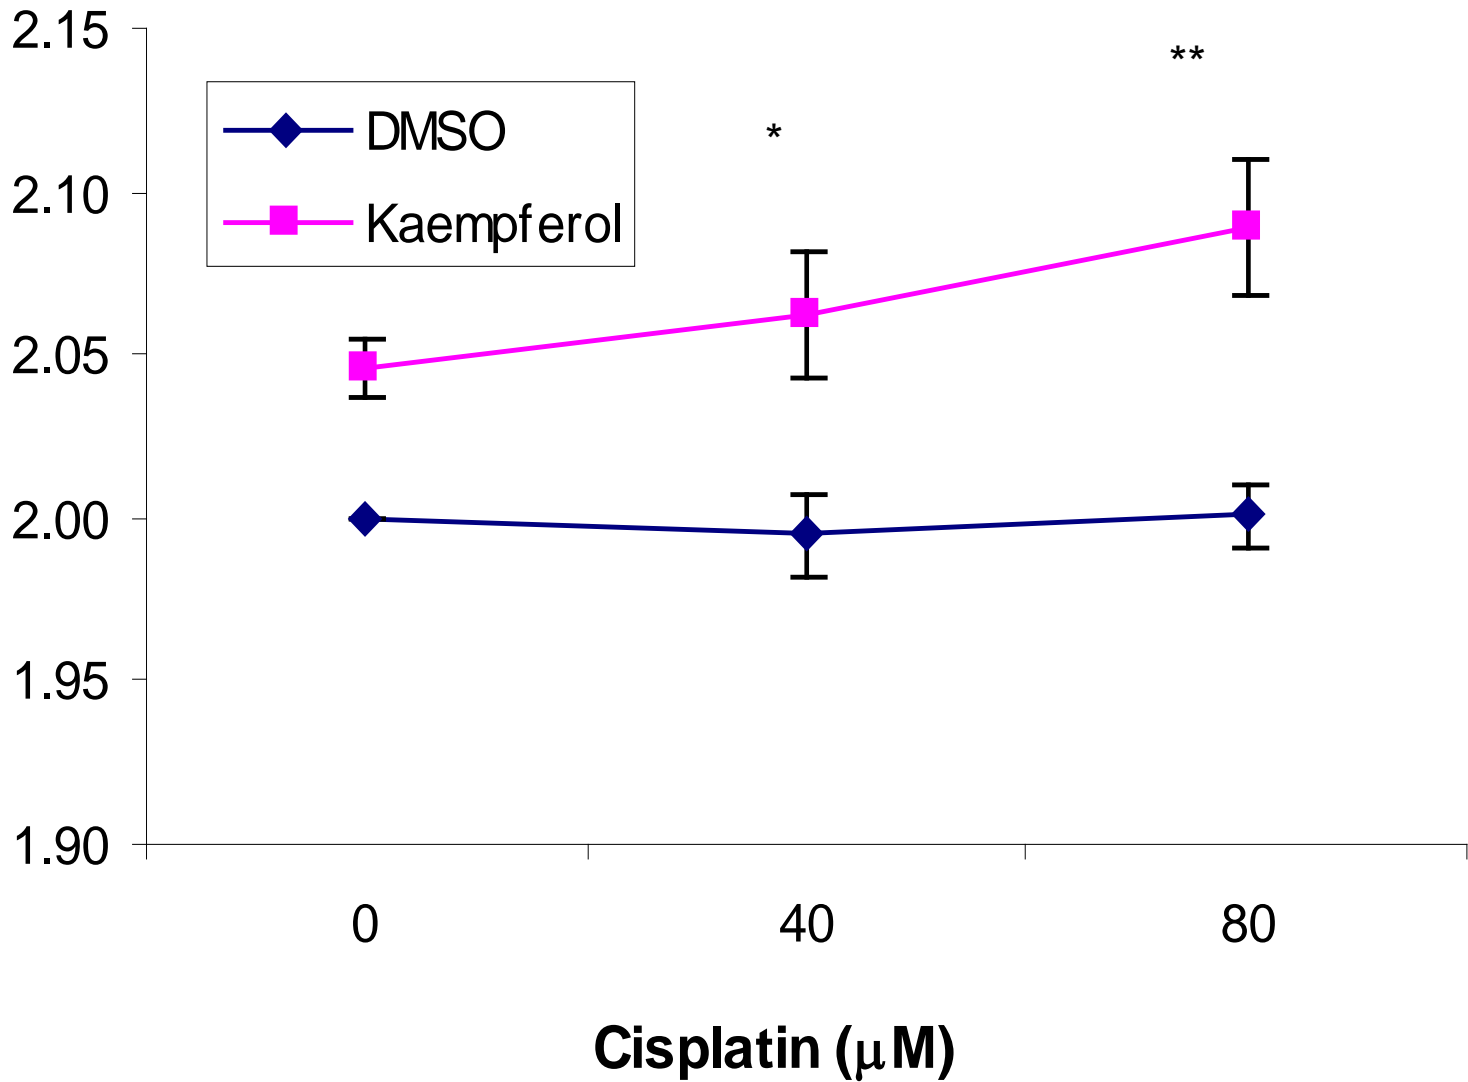

Supplement: MOESM4 [file 9540138]
